17. Ackerman MJ, Priori SG, Willems S, Berul C, Brugada R, Calkins H, Camm AJ, Ellinor PT, Gollob M, Hamilton R, Hershberger RE, Judge DP, Le Marec H, McKenna WJ, Schulze-Bahr E, Semsarian C, Towbin JA, Watkins H, Wilde A, Wolpert C, Zipes DP. HRS/EHRA expert consensus statement on the state of genetic testing for the channelopathies and cardiomyopathies: this document was developed as a partnership between the Heart Rhythm Society (HRS) and the European Heart Rhythm Association (EHRA). *Europace* 2011;**13**:1077–1109.
18. Tester DJ, Ackerman MJ. Postmortem of long QT syndrome genetic testing for sudden unexplained death in the young. *J Am Coll Cardiol* 2007;**49**:240–246.
19. Gladding PA, Evans C-A, Crawford J, Chung SK, Vaughan A, Webster D, Neas K, Love DR, Rees MI, Shelling AN, Skinner JR. Posthumous diagnosis of long QT syndrome from neonatal screening cards. *Heart Rhythm* 2010;**7**:481–486.
20. Skinner JR, Crawford J, Smith W, Aitken A, Heaven D, Evans C-A, Hayes I, Neas KR, Stables S, Koelmeyer T, Denmark L, Vuletic J, Maxwell F, White K, Yang T, Roden DM, Leren TP, Shelling A, Love DR. Prospective, population-based long QT molecular autopsy study of postmortem negative sudden death in 1 to 40 year olds. *Heart Rhythm* 2011;**8**:412–419.
21. Winkel BG, Larsen MK, Berge KE, Leren TP, Nissen PH, Olesen MS, Hollegaard MV, Jespersen T, Yuan L, Nielsen N, Haunsø S, Svendsen JH, Wang Y, Kristensen IB, Jensen HK, Tfelt-Hansen J, Banner J. The prevalence of mutations in KCNQ1, KCNH2, and SCN5A in an unselected national cohort of young sudden unexplained death cases. *J Cardiovasc Electrophysiol* 2012;**23**:1092–1098.
22. Behr E, Wood DA, Wright M, Syrris P, Sheppard MN, Casey A, Davies MJ, McKenna W. Cardiologist assessment of first-degree relatives in sudden arrhythmic death syndrome. *Lancet* 2003;**362**:1457–1459.
23. Hofman N, Tan HL, Clur S-A, Alders M, van Langen IM, Wilde AAM. Contribution of inherited heart disease to sudden cardiac death in childhood. *Pediatrics* 2007;**120**:e967–e973.
24. Link MS, Estes NAM 3rd. How to manage athletes with syncope. *Cardiol Clin* 2007;**25**:457–466; vii.
25. Ranthe MF, Winkel BG, Andersen EW, Risgaard B, Wohlfahrt J, Bundgaard H, Haunsø S, Melbye M, Tfelt-Hansen J, Boyd HA. Risk of cardiovascular disease in family members of young sudden cardiac death victims. *Eur Heart J* 2012;**34**:503–511.

## CARDIOVASCULAR FLASHLIGHT

doi:10.1093/eurheartj/ehf522

Online publish-ahead-of-print 13 December 2013

### A novel type of human spontaneous coronary atherosclerosis with triglyceride deposition

Yoshihiko Ikeda<sup>1†</sup>, Ken-ichi Hirano<sup>1,2†\*</sup>, Norihide Fukushima<sup>3</sup>, and Yoshiki Sawa<sup>3</sup>

<sup>1</sup>Department of Pathology, National Cerebral and Cardiovascular Center, Osaka 565-8565, Japan; <sup>2</sup>Department of Cardiovascular Medicine, Graduate School of Medicine, Osaka University, Osaka 565-0871, Japan; and <sup>3</sup>Department of Cardiovascular Surgery, Graduate School of Medicine, Osaka University, Osaka 565-0871, Japan

\* Corresponding author. Tel: +81 6 6879 8215, Fax: +81 6 6879 8219, Email: khirano@cardiology.med.osaka-u.ac.jp, khirano@cnt-osaka.com

† These authors equally contributed to this work.

Unlike cholesterol, roles of triglyceride (TG) in the atherogenesis are largely unknown. We previously reported a 41-year-old male with a genetic deficiency of adipose triglyceride lipase (ATGL) exhibiting profound TG accumulation in coronary arteries. Here, we pathologically compare his unusual TG-deposit coronary atherosclerosis with usual cholesterol-deposit atherosclerosis in a patient with ischaemic cardiomyopathy.

Both patients received cardiac transplantation (CTx). Transverse sections of coronary arteries from explanted hearts at CTx were double-stained with Sudan black B and immunohistochemistry for smooth muscle cells (SMCs) or macrophages (Mφ).

As shown in the left panels (Panels A and C), the cholesterol-deposit atherosclerosis had the following characteristics: (i) focal and eccentric-type stenosis with large lipid pool (Panels A and C), (ii) infiltration of foamy Mφ (Panel C) with expression of scavenger receptors, (iii) paucity of SMCs (Panel A) in the fibrous cap and shoulders of lesion, (iv) disrupted internal elastic lamina and thin medial layer resulting in remodelling. In contrast, TG-deposit atherosclerosis showed unique features as follows. His coronary arteries showed diffuse concentric-type stenosis (Panel B and Supplementary material online, Figure SA). Majorities of foam cells were SMCs in thick intima and media (Panels B and D). Those foamy SMCs with TG deposition expressed synthetic markers such as SM22α, but not scavenger receptors (Supplementary material online, Figures B and C).

Adipose triglyceride lipase deficiency is an ultra-rare, but extreme and representative case with a novel type of atherosclerosis with TG deposition. The present features were distinct from those of cholesterol-deposit atherosclerosis and Mönckeberg's sclerosis. It would be of significance to know how TG-deposit SMCs contribute to its initiation and development.

Supplementary material is available at *European Heart Journal* online.

Published on behalf of the European Society of Cardiology. All rights reserved. © The Author 2013. For permissions please email: journals.permissions@oup.com

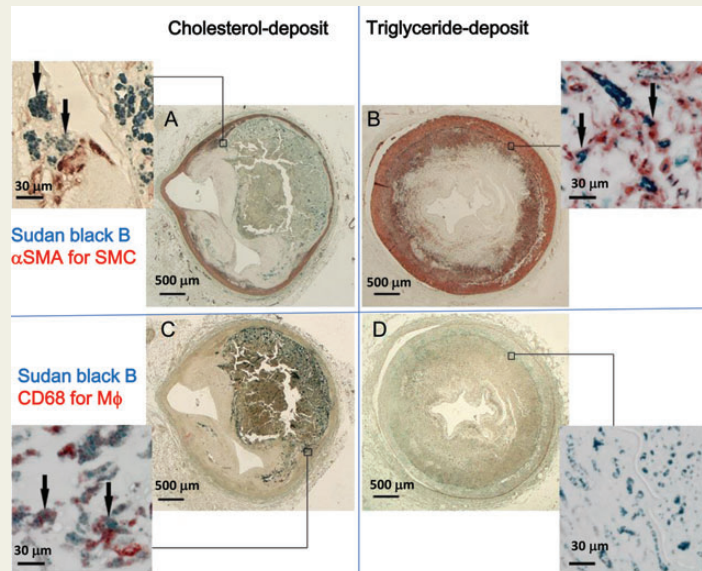

Source: http://academic.oup.com/eurheartj/article-pdf/35/13/875/17354201/eht522.pdf
